# Supplementary material for: Barriers to accessing mental health services for women with perinatal mental illness: systematic review and meta-synthesis of qualitative studies in the UK
Source: BMJ Open. 2019 Jan 24;9(1):e024803. doi: 10.1136/bmjopen-2018-024803 (PMC6347898; doi:10.1136/bmjopen-2018-024803)
Supplement: Supplementary file 2 [file bmjopen-2018-024803supp002.pdf]

**Supplementary Table 1: Comprehensive summary of data extracted from papers for review**

|   | Author /Year       | Study Location             | Study Aims                                                                                | Data collection Method                                              | n = | Study Population                                                                                                                    | Analytic Strategy and interpretative Theory | Key Emergent Themes Relating to Barriers in Care                                                                                                                                                                                                                                       | CASP Score (/10) |
|---|--------------------|----------------------------|-------------------------------------------------------------------------------------------|---------------------------------------------------------------------|-----|-------------------------------------------------------------------------------------------------------------------------------------|---------------------------------------------|----------------------------------------------------------------------------------------------------------------------------------------------------------------------------------------------------------------------------------------------------------------------------------------|------------------|
| 1 | Almond (2011)      | Southern England           | Understanding equity in provision of PND services                                         | Observed discussions between HVs and postnatal women and interviews | 46  | HVs (n=16) managers (n=6) English women (n=12) Bangladeshi women (n=9), cohesion worker (n=2) and mental health practitioner (n=1). | Thematic content data analysis              | -Unacceptability of PND screening<br>-Policy not implemented in practice<br>-Cultural and language barriers                                                                                                                                                                            | 8                |
| 2 | Baldwin (2009)     | Inner London               | Assessment of South Asian mothers well-being by Specialist community public health nurses | Interviews                                                          | 8   | SCPHN working with South Asian mother                                                                                               | Content analysis                            | -Poor support networks<br>-Culturally specific barriers<br>-Domestic and emotional abuse                                                                                                                                                                                               | 5                |
| 3 | Boath (2013)       | Stoke-on-Trent             | Teenage mothers' experiences of PND and their care                                        | In-depth interviews                                                 | 15  | First-time mothers aged 16-19 who scored >12 on EPDS                                                                                | Thematic Framework Analysis                 | -Consequences of disclosure<br>-Poor continuity of care with preferred HCP<br>-Utilisation of family/friends as alternatives for PNMH services<br>-Poor education about perinatal mental health (PNMH) and mental health services (MHS)<br>-Logistical issues                          | 9                |
| 4 | Boddy (2017)       | England                    | Men's experiences of partner's admission to MBU for first episode PP                      | In-depth interviews                                                 | 7   | Partners of women receiving inpatient treatment for first episode PP                                                                | Interpretive Phenomenological Analysis      | -Normalising symptoms<br>- Poor PNMH education<br>-Failures in system to manage emergencies<br>-PNMH as a barrier                                                                                                                                                                      | 10               |
| 5 | Brown (2009)       | Coventry, Warwickshire     | Improve understanding of PNMH service access                                              | Focus-group discussions                                             | 68  | Midwives (n=50) and midwifery students (n=18) working with PMIs                                                                     | Thematic Framework Analysis                 | -Unacceptability of PND screening<br>-HCP reluctant to diagnose<br>-Midwives have poor training on PNMH<br>-Normalising symptoms<br>-Policy not implemented in practice<br>-Unclear referral pathways<br>-Delays being seen by specialist<br>-Failures in system to manage emergencies | 4                |
| 6 | Chew-Graham (2008) | Bristol, Manchester London | Determine GPs' and HVs' roles in management of PND                                        | In-depth interviews                                                 | 23  | GPs (n=19) and HVs (n=14) from RESPOND trial                                                                                        | Inductive thematic analysis approach        | -HCPs' reluctant to diagnose<br>-Unacceptability of PND screening<br>-Normalising symptoms<br>-Poor education about PNMH and available treatments<br>-Poor continuity of care and communication<br>-Inappropriate HCP attitudes                                                        | 8                |

|    |                         |                            |                                                                                                     |                                                  |    |                                                      |                                                                                                                             |                                                                                                                                                                                                                                                                                                          |    |
|----|-------------------------|----------------------------|-----------------------------------------------------------------------------------------------------|--------------------------------------------------|----|------------------------------------------------------|-----------------------------------------------------------------------------------------------------------------------------|----------------------------------------------------------------------------------------------------------------------------------------------------------------------------------------------------------------------------------------------------------------------------------------------------------|----|
| 7  | Chew-Graham (2009)*     | Bristol, Manchester London | GPs, HVs and women's views on disclosure of PND symptoms                                            | In-depth interviews                              | 28 | Women from RESPOND trial scoring >11 on EPDS         | Inductive thematic analysis approach                                                                                        | <ul style="list-style-type: none"> <li>-PNMH diagnosis issues</li> <li>-PNMH as a barrier</li> <li>-Stigma and fear of medications</li> <li>-fear of "bad mum" label</li> <li>-poor opinion of HCPs</li> <li>-Unclear roll of HV</li> <li>-“easier not to ask”</li> <li>-inadequate resources</li> </ul> | 8  |
| 8  | Coates (2015)           | South East England         | PNMH symptoms in new mothers and experiences of assessment                                          | interviews at home (n=15) or via telephone (n=2) | 17 | Women experiencing distress with baby <1year         | Inductive thematic analysis approach<br>-----<br><i>Critical realist approach</i>                                           | <ul style="list-style-type: none"> <li>-PNMH diagnosis issues</li> <li>-Unacceptability of PND screening</li> <li>-“it is actually alright to ask for help”</li> <li>-Stigma of PNMH</li> <li>-Inadequate resources</li> <li>-Logistically issues</li> </ul>                                             | 10 |
| 9  | Coates (2014)           | South East England         | Experiences of postpartum emotional distress                                                        | interviews at home (n=15) or via telephone (n=2) | 17 | Women experiencing distress with baby <1year         | Interpretive Phenomenological Analysis                                                                                      | <ul style="list-style-type: none"> <li>-Fear of “bad mum” label</li> <li>-Normalising symptoms</li> <li>-Waiting for help to come</li> <li>-Poor opinion of HCP</li> <li>-Poor support networks</li> </ul>                                                                                               | 10 |
| 10 | Cooke (2012)            | UK**                       | Parents’ perceptions of barriers to PNMH services                                                   | In-depth interviews                              | 7  | Parents (>18years) with psychological distress       | Thematic Framework Analysis                                                                                                 | <ul style="list-style-type: none"> <li>-Fear of disclosure</li> <li>-Inappropriate HCP attitudes</li> <li>-PNMH as barrier</li> </ul>                                                                                                                                                                    | 5  |
| 11 | Edge (2007)             | Northern England           | Explain low PND service access among Black Caribbean women                                          | In-depth interviews                              | 12 | Black Caribbean women, >18years, scoring >12 on EPDS | Grounded theory approach using constant comparison method                                                                   | <ul style="list-style-type: none"> <li>-Poor PNMH awareness</li> <li>-Culturally specific barriers</li> <li>-Fear of “bad mum” label</li> <li>-Fear of medication side effects</li> <li>-Fear of disclosure and stigma</li> <li>-Inappropriate HCPs attitudes</li> </ul>                                 | 8  |
| 12 | Edge (2008)             | North West England         | Explain low PND service access among Black Caribbean women their absence from UK perinatal research | In-depth interviews                              | 12 | Black Caribbean women, >18years, scoring >12 on EPDS | Thematic Framework Analysis                                                                                                 | <ul style="list-style-type: none"> <li>-Culturally specific barriers</li> <li>-Inappropriate HCP attitudes</li> <li>-Stigma</li> </ul>                                                                                                                                                                   | 10 |
| 13 | Edge and MacKian (2010) | North West England         | Black Caribbean women’s accounts of help-seeking for PND                                            | In-depth interviews                              | 12 | Black Caribbean women, >18years, scoring >12 on EPDS | Thematic Framework Analysis<br>-----<br>Draws on social model of depression and MacKian concepts of ‘reflexive Communities’ | <ul style="list-style-type: none"> <li>-Culturally specific barriers</li> <li>-Poor PNMH awareness</li> </ul>                                                                                                                                                                                            | 9  |

|    |                |                       |                                                                                                                 |                                                                 |    |                                                                                                                                         |                                                                                 |                                                                                                                                                                                                                                                                                            |   |
|----|----------------|-----------------------|-----------------------------------------------------------------------------------------------------------------|-----------------------------------------------------------------|----|-----------------------------------------------------------------------------------------------------------------------------------------|---------------------------------------------------------------------------------|--------------------------------------------------------------------------------------------------------------------------------------------------------------------------------------------------------------------------------------------------------------------------------------------|---|
| 14 | Edge (2010)    | Northern England      | HCPs views about PNMH care for BME women                                                                        | In-depth interviews and Focus Group discussions                 | 42 | GPs (n=5), midwives (n=22), midwifery managers (n=5), hospital doctors (n=2), HVs (n=5), volunteers (n=3)                               | Thematic Framework Analysis                                                     | <ul style="list-style-type: none"> <li>-Physical health over PNMH</li> <li>-Policy not implemented</li> <li>-Diagnostic difficulties</li> <li>-Poor interdisciplinary communication</li> <li>-Unclear referral pathways</li> <li>-Lack of resources</li> <li>-Language barriers</li> </ul> | 9 |
| 15 | Edge (2011)    | Northern England      | Black Caribbean women's opinion of PND service access                                                           | In-depth interviews                                             | 42 | Black Caribbean women >18years, with PND or knew someone who had PND                                                                    | Thematic Framework Analysis                                                     | <ul style="list-style-type: none"> <li>-Previous negative NHS experience</li> <li>-Inadequate resources</li> <li>-Poor support networks</li> <li>-Culture barriers, poor awareness of PNMH</li> </ul>                                                                                      | 9 |
| 16 | Evans (2017)   | East Midlands         | Women's experiences of anxiety in pregnancy and their views on the use of anxiety instruments in antenatal care | Focus group discussions                                         | 19 | Woman >18 years old who had given birth in last nine months. Women had to have considered themselves as having anxiety during pregnancy | Template analysis                                                               | <ul style="list-style-type: none"> <li>-Not able to share worries with others and feeling isolated</li> <li>-Poor communication</li> <li>-Unclear referral pathways</li> <li>-Assessment tools as a tick box exercise</li> </ul>                                                           | 7 |
| 17 | Gardner (2014) | Manchester            | UK-based West African mothers experiences of PND                                                                | In-depth interviews                                             | 6  | Black West African women scoring >10 on EPDS and using self-help parenting groups                                                       | Interpretive Phenomenological Analysis                                          | <ul style="list-style-type: none"> <li>-Poor PND awareness</li> <li>-Poor support networks</li> <li>-Lack of religious faith</li> <li>-Logistical issues</li> <li>-Stigma</li> </ul>                                                                                                       | 8 |
| 18 | Glover (2014)  | Northern England      | Women's experiences of PP and their causal explanations                                                         | In-depth interviews                                             | 7  | Women accessing specialist psychiatric services due episode of PP <10years ago                                                          | Inductive thematic analysis<br>-----<br>Draws on the stress-vulnerability model | <ul style="list-style-type: none"> <li>-Normalising symptoms</li> <li>-Poor advice from friends</li> <li>-Poor education about PP</li> <li>-Baby as a barrier</li> <li>-Focus on physical health</li> <li>-Stigma</li> </ul>                                                               | 9 |
| 19 | Husain (2015)  | Manchester Lancashire | Pilot trial of culturally-adapted PHP for British South Asian women with PND                                    | In-depth interviews (Conducted in Urdu, transcribed in English) | 17 | British South Asian Women with PND from Bangladesh (n=1) Pakistan (n=14) India (n=2). All participants from ROSHNI-2 trial              | Thematic Framework Analysis                                                     | <ul style="list-style-type: none"> <li>-Domestic and emotional abuse</li> <li>-Logistical issues</li> <li>-Language and cultural barriers</li> <li>-Lack of anonymity in therapy</li> <li>-Anxiety about treatment</li> </ul>                                                              | 8 |
| 20 | Jomeen (2013)  | Northern England      | HVs' experiences of psychological distress and PMI assessment                                                   | Focus Group Discussions                                         | 5  | HVs attending an optional PNMH training day                                                                                             | Thematic Framework Analysis                                                     | <ul style="list-style-type: none"> <li>-Lack of formal PNMH training</li> <li>-Diagnostic issues</li> <li>-Stigma</li> <li>-Issues with interpreters</li> <li>-Poor opinion of HCPs</li> <li>-Issues with referral pathway</li> <li>-Interdisciplinary communication</li> </ul>            | 9 |

|    |                 |                       |                                                                                                                                     |                                                                      |    |                                                                                                                                              |                                                                                                            |                                                                                                                                                                                                                                                                                                                                      |    |
|----|-----------------|-----------------------|-------------------------------------------------------------------------------------------------------------------------------------|----------------------------------------------------------------------|----|----------------------------------------------------------------------------------------------------------------------------------------------|------------------------------------------------------------------------------------------------------------|--------------------------------------------------------------------------------------------------------------------------------------------------------------------------------------------------------------------------------------------------------------------------------------------------------------------------------------|----|
| 21 | Lam (2012)      | Manchester            | Investigate Chinese women's postnatal experiences                                                                                   | In-depth interviews (conducted in Chinese and English)               | 8  | UK-based, postnatal, Chinese women. EPDS from 2-17***                                                                                        | Grounded theory approach                                                                                   | <ul style="list-style-type: none"> <li>-Poor information available</li> <li>-Utilisation of family, friends and online forums as an alternative for PNMH services</li> <li>-Language barrier</li> <li>-Fear of family conflict</li> <li>-Conflicting advice from professionals and family</li> <li>-preoccupied with baby</li> </ul> | 9  |
| 22 | McGookin (2017) | Manchester            | Student Midwives awareness, knowledge and experience of antenatal anxiety                                                           | Semi-structured in-depth interviews (19-30 minutes)                  | 7  | Student Midwives (year 1-3)                                                                                                                  | Thematic analysis                                                                                          | <ul style="list-style-type: none"> <li>-Fear of consequences of disclosure</li> <li>-lack of education and awareness about mental health</li> <li>-poor training</li> <li>-inappropriate staff attitudes</li> <li>-Lack of time and resources</li> </ul>                                                                             | 7  |
| 23 | McGrath (2013)  | North West England    | Understanding PP recovery                                                                                                           | In-depth interviews conducted via phone (n=1) or face-to-face (n=11) | 12 | Women with any postnatal psychosis according to International classification of Disease- version 10 (ICD-10)                                 | Grounded theory approach<br>-----<br>Draws on 'Recovery framework' and 'Biopsychosocial models of illness' | <ul style="list-style-type: none"> <li>-PNMH as a barrier</li> <li>-Fear of "bad mum" label</li> <li>-Stigma</li> </ul>                                                                                                                                                                                                              | 10 |
| 24 | Millet (2018)   | London                | Women's and HCPs experience of access to <i>Improving Access to Psychological therapies</i> (IAPT) services during perinatal period | Interviews with service users (n=12) and therapists (n=14)           | 26 | Women referred to mental health services who spoke English and had a baby aged 6-9 months at time of interview. Therapists working for IAPT. | Thematic Analysis                                                                                          | <ul style="list-style-type: none"> <li>-Normalising symptoms</li> <li>-Fear of "bad mum" label and consequences of disclosure</li> <li>-IAPT not tailored to individual with PNMH conditions</li> <li>-Non baby-friendly environment</li> <li>-Lack of family support</li> </ul>                                                     | 9  |
| 25 | Nicholls (2007) | Sussex                | Experiences of postnatal-PTSD in couples relationship                                                                               | In-depth interviews                                                  | 12 | Couples where either women (n=3), partner (n=1) or both (n=2) fulfilled DSM-IV criteria for postnatal-PTSD ****                              | Thematic Framework Analysis                                                                                | <ul style="list-style-type: none"> <li>-Difficulty of discussing PNMH</li> <li>-Support networks</li> <li>-Previous negative NHS experience</li> </ul>                                                                                                                                                                               | 8  |
| 26 | Patel (2013)    | North West of England | PND illness beliefs                                                                                                                 | In-depth interviews                                                  | 11 | Women with PND or depression in pregnancy which continued after birth and scored >10 on EPDS                                                 | Grounded Theory<br>-----<br>Draws on 'Leventhal's self-regulation model of illness beliefs'                | <ul style="list-style-type: none"> <li>-Fear of "bad mum" label</li> <li>-Normalising symptoms and unknown cause of symptoms</li> <li>-Stigma</li> <li>-PNMH as barrier</li> </ul>                                                                                                                                                   | 9  |
| 27 | Phillips (2015) | UK                    | Student midwives awareness of PMIs                                                                                                  | Focus group discussions (2 groups lasting 1 hour)                    | 9  | Student midwives within 6 months of completing degree.                                                                                       | Thematic Framework Analysis                                                                                | <ul style="list-style-type: none"> <li>-Poor resources</li> <li>-"easier not to ask"</li> <li>-Inadequate education about PNMH</li> </ul>                                                                                                                                                                                            | 8  |

|    |                   |                                             |                                                                                         |                                                       |    |                                                                                                                                                                                                   |                                                                      |                                                                                                                                                                                                                 |    |
|----|-------------------|---------------------------------------------|-----------------------------------------------------------------------------------------|-------------------------------------------------------|----|---------------------------------------------------------------------------------------------------------------------------------------------------------------------------------------------------|----------------------------------------------------------------------|-----------------------------------------------------------------------------------------------------------------------------------------------------------------------------------------------------------------|----|
| 28 | Plunkett (2017)   | North West England                          | Role of baby in PP recovery from                                                        | In-depth interviews phone (n=7) or face-to-face (n=5) | 12 | Women who had experienced PP. (checked on a "symptom checklist")                                                                                                                                  | Thematic Framework Analysis<br>-----<br>*****                        | -Baby as motivating recovery factor<br>-Fear of disclosure                                                                                                                                                      | 10 |
| 29 | Radcliffe (2011)  | Three UK hospital trusts                    | Provider experiences of services access and stigmatisation for substance-misusing women | In-depth interviews and participant observations      | 46 | Community midwives, specialist midwives, postnatal ward staff, sonographers (n=22). Perinatal women accessing substance-misuse clinics (n=24)                                                     | Grounded Theory<br>-----<br>Uses a 'social constructionist approach' | -Poor diagnostic tools<br>-Stigma<br>-Logistical issues (eg. lack of diary to keep appointments)                                                                                                                | 4  |
| 30 | Rothera (2008)    | Trent, Leicestershire, Northampton, Rutland | To highlight issues with PNMH management                                                | In-depth interviews and Focus Group discussions       | 39 | HVs(n=4), Midwife (n=4), GP's (n=3), mental health practitioner (n=2), community psychiatric nurse (n=8), obstetrician (n=5), psychiatrists (n=9), managers (n=4)                                 | Analytic induction and data reduction                                | -Failure to manage emergencies<br>-Policy not implemented<br>-Poor HCP PHM education and awareness<br>-Interdisciplinary communication                                                                          | 7  |
| 31 | Rowan (2010)      | Southern England                            | Exploration of policy recommendation implementation                                     | In-depth interviews                                   | 8  | Managers of maternity services, community midwives, community psychiatric nurses and psychiatrists                                                                                                | Thematic Framework Analysis                                          | -Policy not implemented<br>-Issues with catchment areas<br>-Poor awareness about PNMH treatments                                                                                                                | 8  |
| 32 | Slade (2010)      | Trent                                       | Women's experiences of HVs identifying and managing PND (part of PoNDER trial).         | In-depth interviews                                   | 30 | Women in PoNDER trial with 6-week PND score >18                                                                                                                                                   | template approach                                                    | -Poor support networks<br>-Fear of disclosure and stigma<br>-Unclear role of HV and poor training<br>-Poor continuity of care<br>-Inadequate resources<br>-Negative experiences of HCP                          | 9  |
| 33 | Wan (2008)        | Manchester Liverpool                        | Explored providers' perspectives of support needs of mothers with schizophrenia         | In-depth interviews                                   | 28 | Midwives (n=15), obstetric consultant (n=1), psychiatrist (n=1), registered mental health nurses (n=7), manager (n=1) nursery nurse (n=3). Recruited from MBUs (n=9) or antenatal clinics (n=19). | Thematic Framework Analysis                                          | -Fear of consequences<br>-Lack of midwifery training<br>-PNMH as barrier<br>-Interdisciplinary communication<br>-Lack of education about PNMH<br>-Continuity of care<br>-Support networks<br>-Lack of resources | 10 |
| 34 | Wittkowski (2011) | Greater Manchester                          | South Asian mothers' understanding of PND                                               | In-depth interviews                                   | 10 | South Asian mothers scoring >12 on EPDS                                                                                                                                                           | Grounded Theory approach                                             | -Fear of upsetting others, losing job and stigma<br>-Cultural and language barriers<br>-Racial discrimination<br>-Poor PNMH awareness<br>-Poor social support networks<br>-Interdisciplinary communication      | 8  |

|    |              |         |                                                                     |                     |   |                                                                                     |                                        |                                                                                                                                        |   |
|----|--------------|---------|---------------------------------------------------------------------|---------------------|---|-------------------------------------------------------------------------------------|----------------------------------------|----------------------------------------------------------------------------------------------------------------------------------------|---|
| 35 | Wyatt (2015) | England | How women and their significant others make sense of PP experiences | In-depth interviews | 7 | Women with PP and their carers (partners (n=5), family members (n=1) friends (n=1)) | Interpretive Phenomenological Analysis | -Poor social support networks<br>-Fear of "bad mum" label<br>-Poor knowledge of PNMH amongst carers<br>-Feeling guilty for feeling ill | 9 |
|----|--------------|---------|---------------------------------------------------------------------|---------------------|---|-------------------------------------------------------------------------------------|----------------------------------------|----------------------------------------------------------------------------------------------------------------------------------------|---|

**Table 4.1 Key:**

*\*Quotes from the Chew-Graham 2008 study population were also included in this paper*

*\*\*Paper quotes: "Culturally and socio-economically diverse, urban region of UK"*

*\*\*\*This review will only extract data from participants scoring >10 on EPDS*

*\*\*\*\*This review will only extract data from the women within the study diagnosed with birth-related PTSD*

*\*\*\*\*\*Paper mentions there is limited theory and pre-existing research on this topic so recognises it may not be possible to map findings onto a formal theory*
