# Supplementary material for: Barriers to accessing mental health services for women with perinatal mental illness: systematic review and meta-synthesis of qualitative studies in the UK
Source: BMJ Open. 2019 Jan 24;9(1):e024803. doi: 10.1136/bmjopen-2018-024803 (PMC6347898; doi:10.1136/bmjopen-2018-024803)
Supplement: Supplementary file 3 [file bmjopen-2018-024803supp003.pdf]

Supplementary Table 2: Summary of CASP tool used for quality appraisal of Qualitative Data

Key: ✓= Yes; X= No; ?= Insufficient information to make assessment

| Author/Year             | Clear Aims | Appropriate methodology | Appropriate research design | Appropriate recruitment strategy | Appropriate data collection methods | Researcher-participant relationship considered | Ethical issues considered | Rigorous data analysis | Clear findings | Value of research | Overall Assessment |
|-------------------------|------------|-------------------------|-----------------------------|----------------------------------|-------------------------------------|------------------------------------------------|---------------------------|------------------------|----------------|-------------------|--------------------|
| Almond (2011)           | ✓          | ✓                       | ?                           | ✓                                | ✓                                   | ✓                                              | ✓                         | ✓                      | ✓              | ?                 | Adequate           |
| Baldwin (2009)          | ✓          | ?                       | ✓                           | ✓                                | ✓                                   | ?                                              | ✓                         | ?                      | X              | ?                 | Weak               |
| Boath (2013)            | ✓          | ✓                       | ✓                           | ✓                                | ✓                                   | ?                                              | ✓                         | ✓                      | ✓              | ✓                 | Strong             |
| Boddy (2017)            | ✓          | ✓                       | ✓                           | ✓                                | ✓                                   | ✓                                              | ✓                         | ✓                      | ✓              | ✓                 | Strong             |
| Brown (2009)            | ✓          | ✓                       | ✓                           | ?                                | ?                                   | ?                                              | ?                         | ?                      | ✓              | ?                 | Weak               |
| Chew-Graham (2008)      | ✓          | ✓                       | ✓                           | ✓                                | ✓                                   | ?                                              | ?                         | ✓                      | ✓              | ✓                 | Adequate           |
| Chew-Graham (2009)      | ✓          | ✓                       | ✓                           | ✓                                | ✓                                   | ?                                              | ✓                         | ✓                      | ✓              | ?                 | Adequate           |
| Coates (2015)           | ✓          | ✓                       | ✓                           | ✓                                | ✓                                   | ✓                                              | ✓                         | ✓                      | ✓              | ✓                 | Strong             |
| Coates (2014)           | ✓          | ✓                       | ✓                           | ✓                                | ✓                                   | ✓                                              | ✓                         | ✓                      | ✓              | ✓                 | Strong             |
| Cooke (2012)            | X          | ✓                       | ✓                           | ?                                | ?                                   | ✓                                              | ✓                         | ?                      | ✓              | ?                 | Weak               |
| Edge (2007)             | ✓          | ✓                       | ✓                           | ✓                                | ✓                                   | ?                                              | ✓                         | ✓                      | ?              | ✓                 | Adequate           |
| Edge (2008)             | ✓          | ✓                       | ✓                           | ✓                                | ✓                                   | ✓                                              | ✓                         | ?                      | ✓              | ✓                 | Strong             |
| Edge and MacKian (2010) | ✓          | ✓                       | ✓                           | ✓                                | ✓                                   | ?                                              | ✓                         | ✓                      | ✓              | ✓                 | Strong             |
| Edge (2010)             | ✓          | ✓                       | ✓                           | ✓                                | ✓                                   | ?                                              | ✓                         | ✓                      | ✓              | ✓                 | Strong             |
| Edge (2011)             | ✓          | ✓                       | ✓                           | ✓                                | ✓                                   | ?                                              | ✓                         | ✓                      | ✓              | ✓                 | Strong             |
| Evans (2017)            | ✓          | ✓                       | ✓                           | ✓                                | ✓                                   | ?                                              | ✓                         | ?                      | ✓              | ?                 | Adequate           |
| Gardner (2014)          | ✓          | ✓                       | ✓                           | ✓                                | ✓                                   | ?                                              | ✓                         | ?                      | ✓              | ✓                 | Adequate           |
| Glover (2014)           | ✓          | ✓                       | ✓                           | ✓                                | ✓                                   | ?                                              | ✓                         | ✓                      | ✓              | ✓                 | Strong             |
| Husain (2015)           | ✓          | ✓                       | ✓                           | ✓                                | ✓                                   | ✓                                              | ✓                         | ?                      | ✓              | ?                 | Adequate           |
| Jomeen (2013)           | ✓          | ✓                       | ✓                           | ?                                | ✓                                   | ✓                                              | ✓                         | ✓                      | ✓              | ✓                 | Strong             |
| Lam (2012)              | ✓          | ✓                       | ✓                           | ✓                                | ✓                                   | ✓                                              | ?                         | ✓                      | ✓              | ✓                 | Strong             |
| McGookin (2017)         | ✓          | ✓                       | ✓                           | ✓                                | ✓                                   | ?                                              | ✓                         | ?                      | ✓              | ?                 | Adequate           |
| McGrath (2013)          | ✓          | ✓                       | ✓                           | ✓                                | ✓                                   | ✓                                              | ✓                         | ✓                      | ✓              | ✓                 | Strong             |
| Millet (2018)           | ✓          | ✓                       | ✓                           | ?                                | ✓                                   | ✓                                              | ✓                         | ✓                      | ✓              | ✓                 | Strong             |
| Nicholls (2007)         | ✓          | ✓                       | ✓                           | ✓                                | ?                                   | ?                                              | ✓                         | ✓                      | ✓              | ✓                 | Adequate           |
| Patel (2013)            | ✓          | ✓                       | ✓                           | ?                                | ✓                                   | ✓                                              | ✓                         | ✓                      | ✓              | ✓                 | Strong             |
| Phillips (2015)         | ✓          | ?                       | ✓                           | ✓                                | ✓                                   | ✓                                              | ✓                         | ?                      | ✓              | ✓                 | Adequate           |
| Plunkett (2017)         | ✓          | ✓                       | ✓                           | ✓                                | ✓                                   | ✓                                              | ✓                         | ✓                      | ✓              | ✓                 | Strong             |
| Radcliffe (2011)        | X          | ✓                       | ?                           | ?                                | ✓                                   | ?                                              | ✓                         | ✓                      | X              | ?                 | Weak               |
| Rothera (2008)          | ✓          | ✓                       | ✓                           | ✓                                | ✓                                   | ?                                              | ?                         | ?                      | ✓              | ✓                 | Adequate           |
| Rowan (2010)            | ✓          | ✓                       | ✓                           | ✓                                | ✓                                   | ?                                              | ✓                         | ?                      | ✓              | ✓                 | Adequate           |
| Slade (2010)            | ✓          | ✓                       | ✓                           | ✓                                | ✓                                   | ?                                              | ✓                         | ✓                      | ✓              | ✓                 | Strong             |
| Wan(2008)               | ✓          | ✓                       | ✓                           | ✓                                | ✓                                   | ✓                                              | ✓                         | ✓                      | ✓              | ✓                 | Strong             |
| Wittkowski (2011)       | X          | ✓                       | ✓                           | ?                                | ✓                                   | ✓                                              | ✓                         | ✓                      | ✓              | ✓                 | Adequate           |
| Wyatt (2015)            | ✓          | ✓                       | ✓                           | ?                                | ✓                                   | ✓                                              | ✓                         | ✓                      | ✓              | ✓                 | Strong             |
